# Supplementary material for: Chemical conversion synthesis of magnetic Fe1−xCox alloy nanosheets with controlled composition
Source: Royal Society of Chemistry journal article supplement (doi:10.1039/d0cc07791g), 2021-01-01
Supplement: d0cc07791g1.pdf [file d0cc07791g1.pdf]

## Supporting information

### Chemical Conversion Synthesis of Magnetic Fe<sub>1-x</sub>Co<sub>x</sub> Alloy Nanosheets with Controlled Composition

Desheng Pan,<sup>a</sup> Bin Xiao,<sup>a</sup> Qing Wang<sup>b</sup> and Hong Wang<sup>\*a</sup>

<sup>a</sup> Department of Materials Science and Engineering and Shenzhen Engineering Research Center for Novel Electronic Information Materials and Devices, South University of Science and Technology, Shenzhen, 518055, China

<sup>b</sup> Department of Materials Science and Engineering, The Pennsylvania State University, University Park, Pennsylvania 16802, USA

#### Experimental Details

**Materials.** Commercially available reagents including iron acetylacetonate (Fe(acac)<sub>3</sub>, 98%), cobalt acetylacetonate (Co(acac)<sub>2</sub>, 97%), thiourea(99%), diethylenetriamine (DETA, 99%), trioctylphosphine (TOP, 90%), hexane (97%) and ethanol (99.7%) were purchased from Shanghai aladdin bio-chem technology Co., LTD. (China). All chemicals were used as received without any further purification.

**Synthesis of Fe<sub>1-x</sub>Co<sub>x</sub>S<sub>1.2</sub>-DETA hybrid nanosheets.** Fe(acac)<sub>3</sub> and Co(acac)<sub>2</sub> with the molar ratio of 9:1, 7:3, 5:5, 3:7 and 8 mmol thiourea with a total metal/sulfur molar ratio of 1:1 were mixed in 120 mL DETA in a 250 mL three-neck flask. The mixture solution was heated to 100 °C and kept for 1 h under a nitrogen flow. Afterwards, the temperature was raised to 200 °C at a ramping rate of 5 °C min<sup>-1</sup> and aged for 3 h, followed by cool down naturally. The precipitates were centrifuged at 5000 rpm min<sup>-1</sup> and washed by 20 mL ethanol for three times. The products were dried in vacuum.

**Conversion of Fe<sub>1-x</sub>Co<sub>x</sub>S<sub>1.2</sub>-DETA hybrids to Fe<sub>1-x</sub>Co<sub>x</sub> nanosheets.** 500 mg Fe<sub>1-x</sub>Co<sub>x</sub>S-DETA powder mixed with 20 mL TOP was heated to 270 °C at a rate of 5 °C min<sup>-1</sup> and kept for 2h under N<sub>2</sub> flow in a four-neck flask. Then the heating source was removed to cool down to room temperature naturally. The intermediates were obtained when the temperature reached 250 °C in the heating process. The intermediates and final products were centrifuged at 10000 rpm min<sup>-1</sup> and washed by 20 mL ethanol and 20 mL hexane mixture for three times. The products were dried in vacuum and kept for further characterization.

**Characterization.** Powder X-ray diffraction (PXRD) was performed on a Rigaku diffractometer (D8 Eco) using the  $K\alpha$  line of Cu target. The transmission electron microscopy (TEM) and high resolution transmission electron microscopy (HRTEM) images were obtained by a Tecnai F30 transmission electron microscope. The scanning transmission electron microscopy (STEM), selected area electron diffraction (SAED), and energy dispersive spectroscopy (EDS) were carried out by a Talos F200X transmission electron microscope. Thermogravimetric analysis (TGA) was carried out on a STA 449 F5 thermal analyzer under  $N_2$  flow with a heating rate of  $10\text{ }^\circ\text{C}\cdot\text{min}^{-1}$  between  $30\text{ }^\circ\text{C}$  and  $600\text{ }^\circ\text{C}$ . The magnetic hysteresis loops were measured by superconducting quantum interference devices (SQUID) equipped with a vibrating sample magnetometer (VSM).

## Supplementary Figures

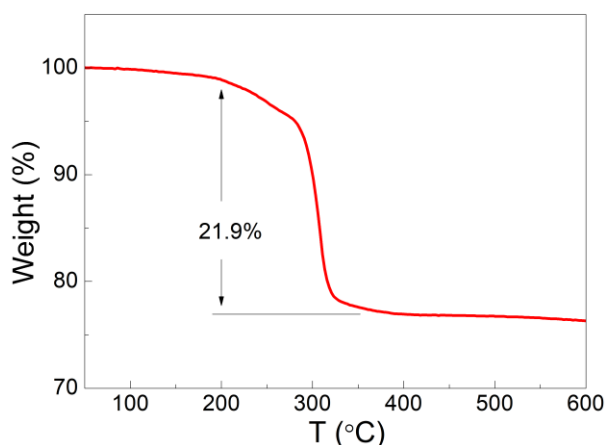

Figure S1 TGA curves of the  $Fe_{0.9}Co_{0.1}S_{1.2}$ -DETA hybrid nanosheets. The weight loss of 21.9 % over 200-400 °C is caused by the loss of DETA molecules intercalated in the hybrid structures.

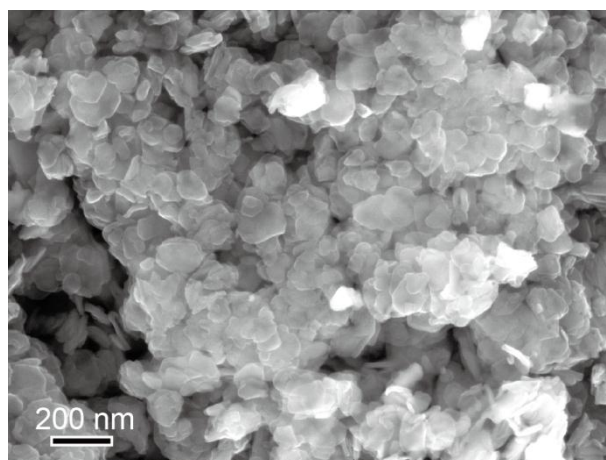

Figure S2 SEM image of the  $Fe_{0.9}Co_{0.1}S_{1.2}$ -DETA hybrid nanosheets.

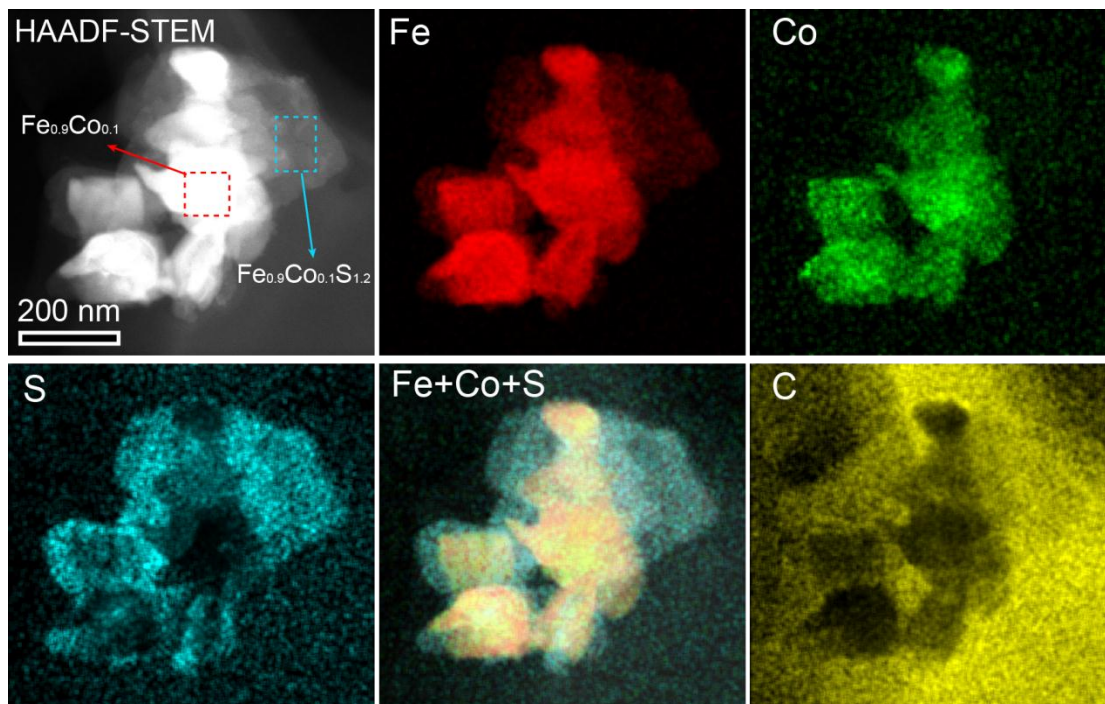

Figure S3 HAADF-STEM and EDX mapping of Fe, Co, S, overlay and C for the intermediates in the converting process. The inhomogeneous distributions of Fe, Co, and S indicate the intermediates are composed of  $\text{Fe}_{0.9}\text{Co}_{0.1}$  and  $\text{Fe}_{0.9}\text{Co}_{0.1}\text{S}_{1.2}$  nanosheets.

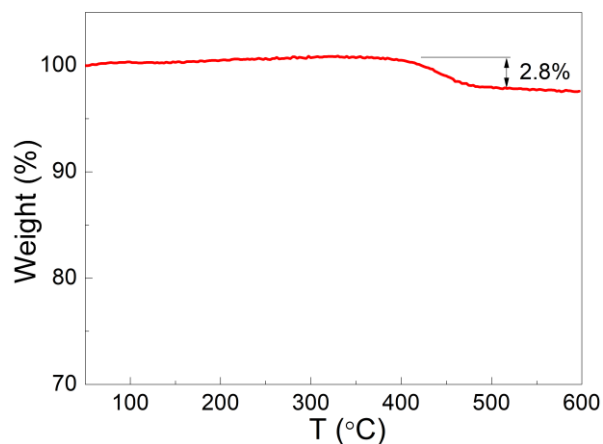

Figure S4 TGA curves of the converted  $\text{Fe}_{0.9}\text{Co}_{0.1}$  magnetic alloy nanosheets. The observation of no weight loss below 400 °C indicates the complete decomposition of its  $\text{Fe}_{0.9}\text{Co}_{0.1}\text{S}_{1.2}$ -DETA hybrid precursors. When the temperature is higher than 400 °C, the weight loss of 2.8 % could be caused by the loss of TOP adsorbed on the surface of the alloy nanosheets.

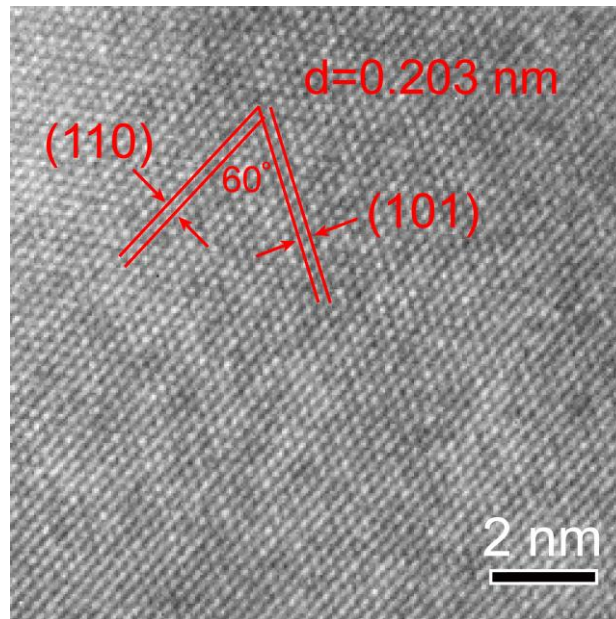

Figure S5 HRTEM image of the  $\text{Fe}_{0.9}\text{Co}_{0.1}$  nanosheet. The HRTEM image shows the  $\text{Fe}_{0.9}\text{Co}_{0.1}$  nanosheet is structurally single-crystal with the lattice spacing of 0.203 nm for the (110) and (101) facets, corresponding to the {110} planes of the cubic FeCo. The orientational relationship between (110) and (101) planes confirms that the alloy nanosheet is oriented along [-111] zone axis.

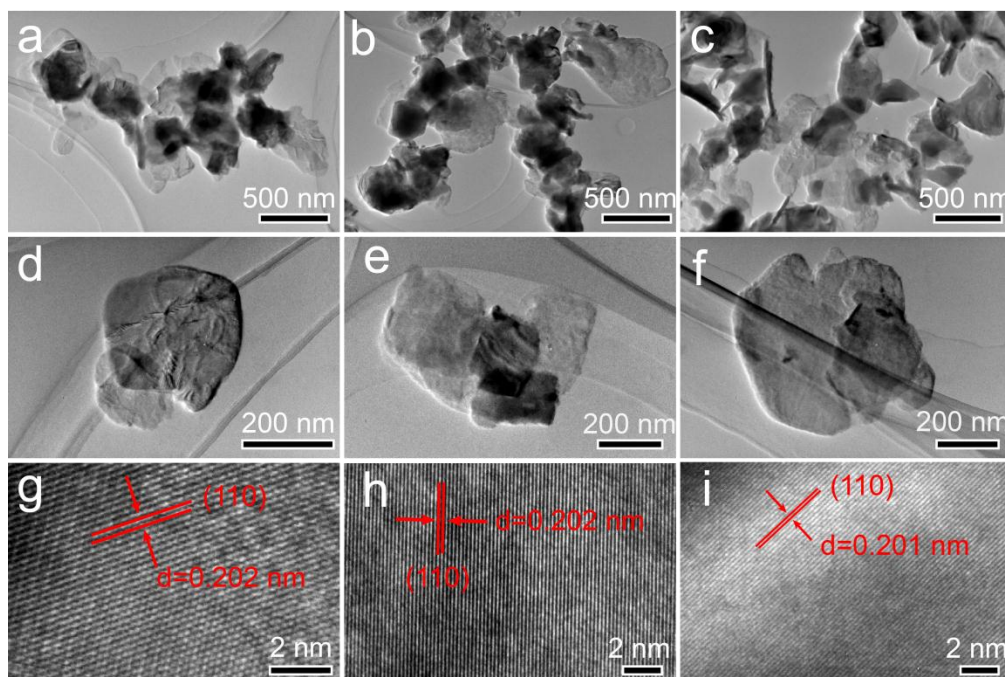

Figure S6 TEM and HRTEM images of (a, d, g)  $\text{Fe}_{0.7}\text{Co}_{0.3}$ , (b, e, h)  $\text{Fe}_{0.5}\text{Co}_{0.5}$  and (c, f, i)  $\text{Fe}_{0.3}\text{Co}_{0.7}$  alloy products. All the converted  $\text{Fe}_{1-x}\text{Co}_x$  products share the morphology of 2D nanosheets. The (110) crystal faces are identified from the HRTEM images.

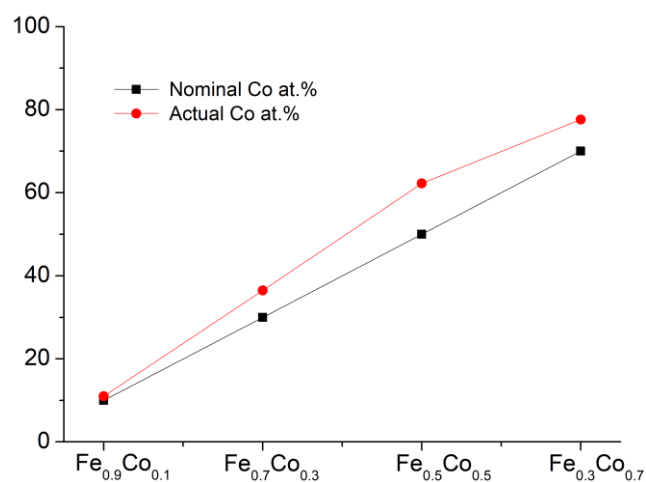

Figure S7 The nominal (black squares) and actual (red circles) Co at.% in the  $\text{Fe}_{0.9}\text{Co}_{0.1}$ ,  $\text{Fe}_{0.7}\text{Co}_{0.3}$ ,  $\text{Fe}_{0.5}\text{Co}_{0.5}$ , and  $\text{Fe}_{0.3}\text{Co}_{0.7}$  products respectively.

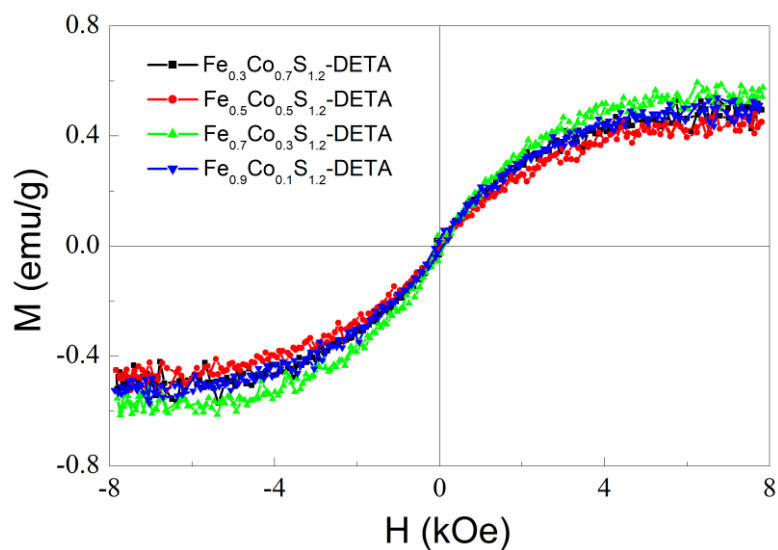

Figure S8 Room-temperature magnetic hysteresis loops of  $\text{Fe}_{1-x}\text{Co}_x\text{S}_{1.2}$ -DETA ( $x=0.1, 0.3, 0.5, 0.7$ ) inorganic-organic hybrid nanosheets.
